# Supplementary material for: MicroRNAs and Their Associated Genes Regulating the Acrosome Reaction in Sperm of High- versus Low-Fertility Holstein Bulls
Source: MDPI journal article supplement (doi:10.3390/ani14060833), 2024-03-08
Supplement: s1 [file s1]

**Table S1.** | Bovine miRBase profiler plate, consisting of primers for target miRNAs and control genes.

| Layout   | 1            | 2               | 3               | 4               | 5            | 6              | 7             | 8              | 9              | 10             | 11             | 12             |
|----------|--------------|-----------------|-----------------|-----------------|--------------|----------------|---------------|----------------|----------------|----------------|----------------|----------------|
| <b>A</b> | bta-let-7f   | bta-miR-101     | bta-miR-103     | bta-miR-125a    | bta-miR-125b | bta-miR-126-3p | bta-miR-128   | bta-miR-145    | bta-miR-148a   | bta-miR-151-3p | bta-miR-151-5p | bta-miR-16b    |
| <b>B</b> | bta-miR-181a | bta-miR-18a     | bta-miR-18b     | bta-miR-199a-5p | bta-miR-206  | bta-miR-20a    | bta-miR-21-5p | bta-miR-221    | bta-miR-26a    | bta-miR-26b    | bta-miR-27a    | bta-miR-29a    |
| <b>C</b> | bta-miR-31   | bta-miR-320a    | bta-miR-326     | bta-miR-330     | bta-miR-34c  | bta-miR-375    | bta-miR-421   | bta-miR-499a   | bta-miR-99a-5p | bta-miR-7      | bta-miR-7a-5p  | bta-let-7d     |
| <b>D</b> | bta-let-7g   | bta-let-7i      | bta-miR-106a    | bta-miR-107     | bta-miR-10a  | bta-miR-10b    | bta-miR-122   | bta-miR-124b   | bta-miR-129-5p | bta-miR-133b   | bta-miR-137    | bta-miR-139    |
| <b>E</b> | bta-miR-140  | bta-miR-142-3p  | bta-miR-142-5p  | bta-miR-148b    | bta-miR-150  | bta-miR-15b    | bta-miR-17-3p | bta-miR-17-5p  | bta-miR-181b   | bta-miR-181c   | bta-miR-186    | bta-miR-191    |
| <b>F</b> | bta-miR-192  | bta-miR-193a-3p | bta-miR-193a-5p | bta-miR-199a-3p | bta-miR-199b | bta-miR-200a   | bta-miR-200b  | bta-miR-200c   | bta-miR-20b    | bta-miR-210    | bta-miR-214    | bta-miR-215    |
| <b>G</b> | bta-miR-217  | bta-miR-218     | bta-miR-22-5p   | bta-miR-23a     | bta-miR-23b  | bta-miR-24-3p  | bta-miR-25    | bta-miR-296-5p | bta-miR-30a-5p | bta-miR-30b-5p | bta-miR-30c    | bta-miR-30e-5p |
| <b>H</b> | cel-miR39-3p | cel-miR39-3p    | SNORD42B        | SNORD69         | SNORD61      | SNORD68        | SNORD96A      | RNU6-6P        | miRTC          | miRTC          | PPC            | PPC            |

Characterized target miRNAs (plate well positions A1 – G12) and controls (plate well positions H1 – H12).
