# Supplementary material for: MicroRNAs and Their Associated Genes Regulating the Acrosome Reaction in Sperm of High- versus Low-Fertility Holstein Bulls
Source: MDPI journal article supplement (doi:10.3390/ani14060833), 2024-03-08
Supplement: s1 [file s1]

**Figure S1.** The ethidium bromide-stained electrophoresis gel, with amplicons of expected sizes

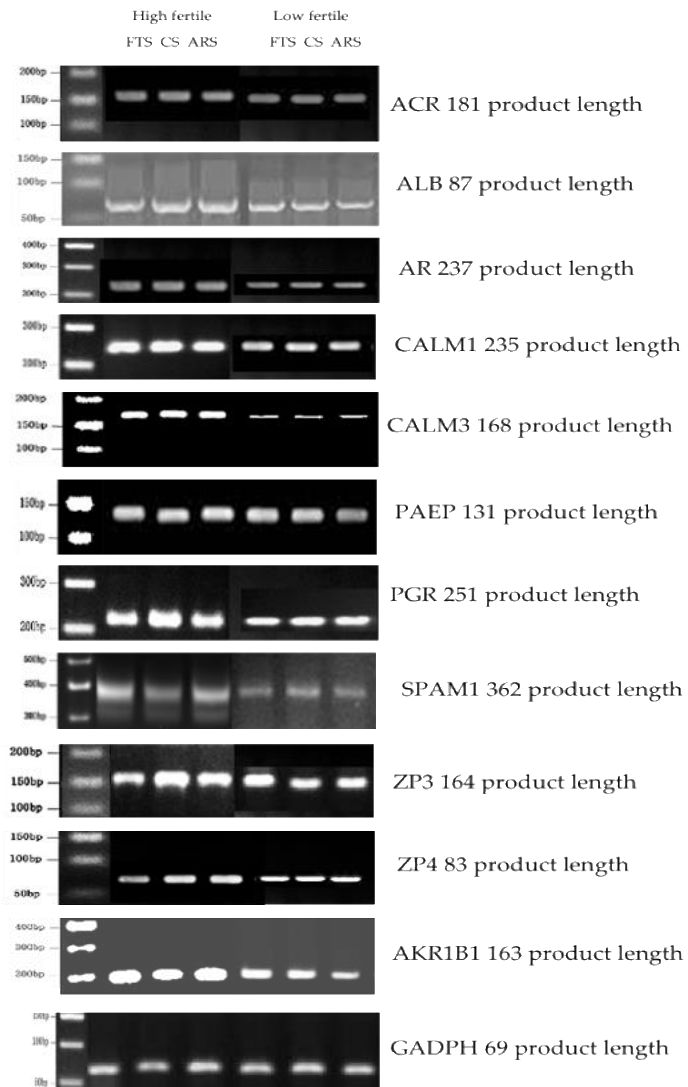

FTS, Frozen-thawed sperm; CS, capacitated sperm; ARS, Acrosome induced sperm; ACR, Acrosin; ALB, Albumin; AR, Androgen Receptor; CALM, Calmodulin; PAEP, Progesterone Associated Endometrial Protein; PGR, Progesterone Receptor; SPAM, Sperm Adhesion Molecule; ZP, Zona Pellucida Glycoprotein; GADPH, Glyceraldehyde-3-phosphate dehydrogenase.
