# Supplementary material for: MicroRNAs and Their Associated Genes Regulating the Acrosome Reaction in Sperm of High- versus Low-Fertility Holstein Bulls
Source: MDPI journal article supplement (doi:10.3390/ani14060833), 2024-03-08
Supplement: s1 [file s1]

**Table S3.** | Human and bovine miR nucleotide sequences.

| miR-id          | Human Sequence                         | Bovine Sequence                  |
|-----------------|----------------------------------------|----------------------------------|
| bta-miR-107     | AGCAGCAUUGUACAGGGCUAUC <b>A</b>        | AGCAGCAUUGUACAGGGCUAUC           |
| bta-mir-125a    | UCCUGAGACCCUUUAACCUGUG <b>A</b>        | UCCUGAGACCCUUUAACCUGUG           |
| bta-mir-129-5p  | CUUUUUGCGGUCUGGGCUUGC                  | CUUUUUGCGGUCUGGGCUUGC <b>U</b>   |
| bta-mir-133b    | UUUGGUCCCCUUAACCAGCUA                  | UUUGGUCCCCUUAACCAGCUA            |
| bta-mir-137     | UUAUUGCUUAAGAAUACGCGUAG                | UUAUUGCUUAAGAAUACGCGUAG          |
| bta-mir-17-5p   | CAAAGUGCUUACAGUGCAGGUAG                | CAAAGUGCUUACAGUGCAGGUAG <b>U</b> |
| bta-mir-193a-3p | AACUGGCCUACAAAGUCCCAGU                 | AACUGGCCUACAAAGUCCCAGU           |
| bta-mir-206     | UGGAAUGUAAGGAAGUGUGUGG                 | UGGAAUGUAAGGAAGUGUGUGG           |
| bta-mir-217     | UACUGCAUCAGGAACUGAUUGGA                | UACUGCAUCAGGAACUGAUUGGA <b>U</b> |
| bta-mir-23b     | AUCACAUUGCCAGGGAUUACCAC                | AUCACAUUGCCAGGGAUUACCAC          |
| bta-mir-27a     | UUCACAGUGGCUAAGUUCCG <b>C</b>          | UUCACAGUGGCUAAGUUCCG             |
| bta-mir-296-5p  | <b>A</b> GGGCCCCCCCCUCAAUCCU <b>GU</b> | GAGGGCCCCCCCCCAAUCCU             |
| bta-mir-320a    | AAAAGCUGGGUUGAGAGGGCGA                 | AAAAGCUGGGUUGAGAGGGCGA           |
| bta-mir-326     | CCUCUGGGCCCUUCCUCCAG                   | CCUCUGGGCCCUUCCUCCAG             |
| bta-mir-330     | GCAAAGCACACGGCCUGCAGAGA                | GCAAAGCACACGGCCUGCAGAGA          |
| bta-mir-34c     | AGGCAGUGUAGUUAGCUGAUUG <b>C</b>        | AGGCAGUGUAGUUAGCUGAUUG           |
| bta-mir-375     | UUUGUUCGUUCGGCUCGCGUGA                 | UUUUGUUCGUUCGGCUCGCGUGA          |
| bta-mir-421     | AUCAACAGACAUUAAUUGGGCGC                | AUCAACAGACAUUAAUUGGGCGC          |
| bta-mir-7       | UGGAAGACUAGUGAUUUUGUUGUU               | UGGAAGACUAGUGAUUUUGUUGUU         |
