# Supplementary material for: MicroRNAs and Their Associated Genes Regulating the Acrosome Reaction in Sperm of High- versus Low-Fertility Holstein Bulls
Source: MDPI journal article supplement (doi:10.3390/ani14060833), 2024-03-08
Supplement: s1 [file s1]

Table S2. | Forward and reverse primer sequence for quantitative real-time polymerase chain reaction amplification of mRNA for bovine sperm samples.

| Gene   | Forward Primer         | Reverse primer         | Product length | Accession number |
|--------|------------------------|------------------------|----------------|------------------|
| ACR    | CCCTGTGGGACACGGTTC     | TCGGCTTCACTGGCTTATTGC  | 181            | NM_173886.2      |
| ALB    | GCTGTGGAGGGTCCAAAAC    | TCAGGTAGGCTGAGATGCCT   | 87             | NM_180992.2      |
| AR     | ACCTGTGTGCCAGCAGAAAT   | TGGGCTGACACTCATAGCCT   | 237            | NM_001244127.1   |
| CALM1  | CAGAGCCGTTAGCGCAGTTG   | TGCCATCACCGTCTTTGTCA   | 235            | NM_001242572.1   |
| CALM3  | CCCCTCAGGTCGATCAAGTG   | CCGAAAACGTCCACAGCTTC   | 168            | NM_001046249.2   |
| PAEP   | CACATCTAGGTGAGCCCCTG   | CAGGAGGGGTGAATGTGGTC   | 131            | NM_173929.3      |
| PGR    | TACCTTAGGCCGGATTCAGA   | ACTTTCTAAGGCGACATGCTGG | 251            | NM_001205356.1   |
| SPAM1  | ACGGGCAGAGATGACAAGATGA | CATTCCAGGCCAGAGGAAAG   | 362            | NM_001008413.3   |
| ZP3    | GTCGATGCTGTAGCAAGGG    | ACGCCACGGTCATTCATCTT   | 164            | NM_173974.3      |
| ZP4    | TCCTGTGAATCTCCAGATGT   | GTGAAGGAGCACATGGCAGT   | 83             | NM_173975.2      |
| AKR1B1 | CAAGCAGTCATGGCCAACCA   | CATTCTGGTACACGTGGGCA   | 163            | NM_001012519.1   |
| GAPDH  | GTGAAGGTCGGAGTGAACGG   | ATTGATGGCGACGATGTCCA   | 93             | NM_001034034.2   |

ACR, Acrosin; ALB, Albumin; AR, Androgen Receptor; CALM, Calmodulin; PAEP, Progesterone Associated Endometrial Protein; PGR, Progesterone Receptor; SPAM, Sperm Adhesion Molecule; ZP, Zona Pellucida Glycoprotein; GAPDH, Glyceraldehyde-3-phosphate dehydrogenase.
